# Supplementary material
Source: publisher figshare collection journal article supplement (https://gsajournals.figshare.com/ndownloader/files/18126509)
Supplement: Supplementary file 1 [file 18126509]

## Sheet: transcript_uncovered_annotation
Supplementary Table 1. Annotation data of possible missing genes in IR64 genome
Transcript ID	Chromosome	Length (bp)	Covered regions (bp)	Coverage	Annotation data
Os01t0158566-00	chr01	637	0	0	Hypothetical conserved gene.
Os01t0197400-01	chr01	2667	0	0	Conserved hypothetical protein.
Os01t0541000-01	chr01	3467	323	0.0931641	Transcriptional factor B3 family protein.
Os01t0553200-00	chr01	1425	40	0.0280702	Conserved hypothetical protein.
Os01t0564532-01	chr01	1580	0	0	Hypothetical gene.
Os01t0564600-00	chr01	1194	0	0	Protein of unknown function DUF247%2C plant family protein.
Os01t0564950-00	chr01	1212	0	0	Protein of unknown function DUF247%2C plant domain containing protein.
Os01t0578500-01	chr01	1733	60	0.034622	F-box protein%2C Indica-Japonica hybrid male sterility
Os01t0710800-01	chr01	1908	103	0.0539832	Conserved hypothetical protein.
Os01t0710800-02	chr01	1176	38	0.0323129	Hypothetical protein.
Os01t0824900-01	chr01	1050	0	0	Protein of unknown function DUF688 domain containing protein.
Os01t0967600-01	chr01	5059	396	0.0782763	Hypothetical protein.
Os01t0967700-01	chr01	1304	0	0	RNA-directed DNA polymerase (reverse transcriptase)%2C related domain containing protein.
Os02t0142060-01	chr02	877	21	0.0239453	Conserved hypothetical protein.
Os02t0163300-01	chr02	988	0	0	Conserved hypothetical protein.
Os02t0163400-01	chr02	4037	217	0.0537528	Hypothetical protein.
Os02t0163500-01	chr02	2914	0	0	Conserved hypothetical protein.
Os02t0163533-01	chr02	3161	90	0.028472	Conserved hypothetical protein.
Os02t0163600-01	chr02	2518	35	0.0138999	Conserved hypothetical protein.
Os02t0213100-01	chr02	1053	65	0.0617284	Conserved hypothetical protein.
Os02t0303000-01	chr02	551	46	0.0834846	Hypothetical gene.
Os02t0303200-01	chr02	519	28	0.0539499	Hypothetical protein.
Os02t0497500-02	chr02	11602	0	0	Similar to DNA repair protein Rad50.
Os02t0583300-00	chr02	933	0	0	Similar to OSIGBa0132O24.3 protein.
Os02t0800300-01	chr02	673	0	0	Conserved hypothetical protein.
Os02t0800400-01	chr02	673	0	0	Conserved hypothetical protein.
Os02t0800700-01	chr02	673	0	0	Conserved hypothetical protein.
Os02t0800900-01	chr02	673	0	0	Conserved hypothetical protein.
Os02t0801000-01	chr02	673	0	0	Conserved hypothetical protein.
Os02t0801100-01	chr02	673	0	0	Conserved hypothetical protein.
Os02t0804500-01	chr02	6978	0	0	Molecular chaperone%2C heat shock protein%2C Hsp40%2C DnaJ domain containing protein.
Os02t0804800-01	chr02	2385	0	0	Conserved hypothetical protein.
Os02t0805200-01	chr02	2124	0	0	Proliferating cell nuclear antigen (PCNA) (Cyclin).
Os02t0805300-01	chr02	2141	0	0	Conserved hypothetical protein.
Os02t0806000-02	chr02	4828	0	0	Similar to N-acetyltransferase.
Os02t0806400-01	chr02	2847	0	0	Similar to Gata zn finger family protein.
Os02t0810300-01	chr02	3134	0	0	Similar to NBD-like protein.
Os02t0810500-01	chr02	4488	419	0.0933601	RabGAP
Os03t0164200-01	chr03	797	0	0	Zinc finger%2C GRF-type domain containing protein.
Os03t0217900-01	chr03	864	0	0	Hypothetical protein.
Os03t0361700-00	chr03	2589	0	0	Similar to Terpene synthase family%2C metal binding domain containing protein%2C expressed.
Os03t0363200-01	chr03	2562	0	0	Protein of unknown function DUF455 family protein.
Os03t0367000-01	chr03	11405	804	0.0704954	Similar to Pasticcino 1-A.
Os03t0367000-02	chr03	11317	716	0.0632677	Hypothetical conserved gene.
Os03t0596200-01	chr03	1835	68	0.0370572	Zinc finger%2C CCHC-type domain containing protein.
Os03t0774300-01	chr03	7147	0	0	HAD superfamily (subfamily IG) hydrolase%2C 5
Os03t0774300-02	chr03	3790	0	0	Similar to cDNA clone
Os03t0774300-03	chr03	3131	0	0	Similar to cDNA clone
Os03t0779500-01	chr03	853	56	0.0656506	Hypothetical protein.
Os04t0103601-01	chr04	469	0	0	Conserved hypothetical protein.
Os04t0114300-00	chr04	691	56	0.081042	Conserved hypothetical protein.
Os04t0125100-01	chr04	982	26	0.0264766	Hypothetical protein.
Os04t0142850-00	chr04	2370	215	0.0907173	Hypothetical protein.
Os04t0143566-00	chr04	1671	113	0.0676242	Hypothetical protein.
Os04t0204900-00	chr04	435	0	0	Hypothetical genes.
Os04t0205101-00	chr04	364	0	0	Hypothetical protein.
Os04t0205200-00	chr04	1713	0	0	NB-ARC domain containing protein.
Os04t0219550-00	chr04	228	0	0	Hypothetical conserved gene.
Os04t0286400-01	chr04	802	49	0.0610973	Conserved hypothetical protein.
Os04t0325300-01	chr04	1551	135	0.0870406	Similar to NB-ARC domain containing protein%2C expressed.
Os04t0383100-00	chr04	342	20	0.0584795	Conserved hypothetical protein.
Os04t0384200-01	chr04	3535	0	0	Conserved hypothetical protein.
Os04t0386650-00	chr04	4197	99	0.0235883	Hypothetical gene.
Os04t0411651-00	chr04	587	0	0	Hypothetical gene.
Os04t0581800-01	chr04	708	6	0.00847458	Heavy metal transport/detoxification protein domain containing protein.
Os04t0634600-01	chr04	1664	20	0.0120192	Hypothetical gene.
Os04t0639700-00	chr04	4531	15	0.00331053	Similar to OSIGBa0138H21-OSIGBa0138E01.9 protein.
Os04t0639800-01	chr04	4811	0	0	Similar to OSIGBa0138H21-OSIGBa0138E01.9 protein.
Os05t0100008-00	chr05	484	0	0	Hypothetical conserved gene.
Os05t0116350-01	chr05	1728	41	0.0237269	Hypothetical conserved gene.
Os05t0426066-00	chr05	252	3	0.0119048	Hypothetical conserved gene.
Os05t0531700-01	chr05	1825	0	0	Glycoside hydrolase%2C subgroup%2C catalytic domain domain containing protein.
Os05t0547600-01	chr05	3532	91	0.0257644	Hypothetical protein.
Os05t0595450-00	chr05	1955	0	0	Hypothetical gene.
Os06t0106500-01	chr06	4388	179	0.0407931	Conserved hypothetical protein.
Os06t0122800-02	chr06	3776	19	0.00503178	Hypothetical conserved gene.
Os06t0138900-01	chr06	1337	0	0	Conserved hypothetical protein.
Os06t0139150-01	chr06	1337	0	0	Conserved hypothetical protein.
Os06t0200500-00	chr06	348	14	0.0402299	Hypothetical conserved gene.
Os06t0235850-01	chr06	1672	0	0	Conserved hypothetical protein.
Os06t0240700-00	chr06	933	0	0	Similar to OSIGBa0132O24.3 protein.
Os06t0271400-00	chr06	1815	0	0	Transposase
Os06t0271500-02	chr06	3141	190	0.0604903	Similar to OSIGBa0132O24.3 protein.
Os06t0558766-00	chr06	4021	0	0	Similar to predicted protein.
Os06t0579201-01	chr06	416	0	0	Conserved hypothetical protein.
Os06t0581701-01	chr06	605	0	0	Conserved hypothetical protein.
Os06t0582600-01	chr06	1624	58	0.0357143	Similar to Cysteine proteinase.
Os06t0713300-01	chr06	2360	40	0.0169492	Conserved hypothetical protein.
Os06t0713400-01	chr06	5362	0	0	Cyclin-like F-box domain containing protein.
Os07t0101300-01	chr07	6322	512	0.080987	Conserved hypothetical protein.
Os07t0105300-01	chr07	1004	0	0	Conserved hypothetical protein.
Os07t0110100-01	chr07	2265	0	0	Conserved hypothetical protein.
Os07t0110500-01	chr07	3239	0	0	Conserved hypothetical protein.
Os07t0113700-01	chr07	9700	507	0.052268	Tetratricopeptide-like helical domain containing protein.
Os07t0117400-01	chr07	2957	0	0	NB-ARC domain containing protein.
Os07t0122200-01	chr07	2552	0	0	Protein of unknown function DUF1719%2C Oryza sativa family protein.
Os07t0122400-01	chr07	3657	39	0.0106645	Tetratricopeptide region domain containing protein.
Os07t0123400-01	chr07	711	37	0.0520394	Similar to ternary complex factor MIP1.
Os07t0123450-01	chr07	1011	0	0	Hypothetical protein.
Os07t0146700-01	chr07	1166	40	0.0343053	Hypothetical protein.
Os07t0238600-00	chr07	237	0	0	Hypothetical conserved gene.
Os07t0285800-00	chr07	1368	0	0	Protein of unknown function DUF1719%2C Oryza sativa domain containing protein.
Os07t0468500-01	chr07	2752	227	0.0824855	Leucine-rich repeat domain containing protein.
Os07t0472900-00	chr07	489	41	0.0838446	Conserved hypothetical protein.
Os07t0577700-01	chr07	4585	0	0	Succinyl-CoA synthetase-like domain containing protein.
Os07t0580300-00	chr07	1014	0	0	Hypothetical conserved gene.
Os07t0648566-01	chr07	699	2	0.00286123	Hypothetical gene.
Os07t0648700-00	chr07	414	0	0	Conserved hypothetical protein.
Os07t0653300-01	chr07	2531	95	0.0375346	Hypothetical gene.
Os08t0102800-01	chr08	634	0	0	Conserved hypothetical protein.
Os08t0122800-02	chr08	3790	293	0.0773087	Kringle
Os08t0181925-00	chr08	387	10	0.0258398	Conserved hypothetical protein.
Os08t0186200-00	chr08	1876	164	0.08742	Hypothetical conserved gene.
Os08t0234400-01	chr08	3393	135	0.0397878	Hypothetical gene.
Os08t0263100-01	chr08	754	0	0	Conserved hypothetical protein.
Os08t0364100-00	chr08	408	0	0	Conserved hypothetical protein.
Os08t0373400-00	chr08	927	0	0	Conserved hypothetical protein.
Os08t0411850-00	chr08	567	0	0	Conserved hypothetical protein.
Os08t0411900-01	chr08	4071	0	0	Conserved hypothetical protein.
Os08t0459300-01	chr08	2402	0	0	Conserved hypothetical protein.
Os08t0459300-02	chr08	2362	0	0	Conserved hypothetical protein.
Os08t0459333-00	chr08	2348	0	0	Hypothetical gene.
Os09t0101300-00	chr09	1056	56	0.0530303	Conserved hypothetical protein.
Os09t0115600-01	chr09	11918	0	0	PLC-like phosphodiesterase%2C TIM beta/alpha-barrel domain domain containing protein.
Os09t0115600-02	chr09	11864	0	0	PLC-like phosphodiesterase%2C TIM beta/alpha-barrel domain domain containing protein.
Os09t0322400-01	chr09	776	0	0	Proteolipid membrane potential modulator domain containing protein.
Os09t0340500-00	chr09	291	0	0	Hypothetical conserved gene.
Os09t0387000-00	chr09	1710	0	0	Conserved hypothetical protein.
Os09t0387150-01	chr09	3201	0	0	Conserved hypothetical protein.
Os09t0391501-00	chr09	423	0	0	Hypothetical gene.
Os09t0436600-01	chr09	3554	61	0.0171638	Conserved hypothetical protein.
Os09t0436600-02	chr09	3497	61	0.0174435	Conserved hypothetical protein.
Os10t0100200-01	chr10	791	0	0	Hypothetical protein.
Os10t0110250-00	chr10	508	20	0.0393701	Oligopeptide transporter domain containing protein.
Os10t0135700-01	chr10	666	9	0.0135135	Hypothetical gene.
Os10t0162846-00	chr10	2157	73	0.0338433	Similar to LRR14.
Os10t0334500-00	chr10	1174	0	0	Similar to Dirigent-like protein%2C expressed.
Os10t0366400-01	chr10	3790	56	0.0147757	Conserved hypothetical protein.
Os10t0366400-02	chr10	3379	19	0.00562297	Hypothetical conserved gene.
Os10t0569500-01	chr10	714	0	0	Conserved hypothetical protein.
Os11t0146200-01	chr11	3690	29	0.00785908	Ankyrin repeat domain containing protein.
Os11t0146200-02	chr11	3694	29	0.00785057	Ankyrin repeat domain containing protein.
Os11t0146300-01	chr11	3205	201	0.0627145	Conserved hypothetical protein.
Os11t0211400-01	chr11	1256	0	0	Hypothetical protein.
Os11t0223300-00	chr11	2123	90	0.0423928	Hypothetical protein.
Os11t0223400-01	chr11	1372	0	0	Similar to NB-ARC domain containing protein%2C expressed.
Os11t0242900-00	chr11	1205	0	0	Putative B3 domain-containing protein Os11g0242900.
Os11t0298500-00	chr11	405	0	0	Similar to 60S ribosomal protein L7-like protein.
Os11t0474500-00	chr11	1497	0	0	NB-ARC domain containing protein.
Os11t0501500-01	chr11	1428	121	0.0847339	Conserved hypothetical protein.
Os11t0532200-01	chr11	3589	19	0.00529395	Hypothetical protein.
Os11t0574500-00	chr11	900	0	0	Similar to F-box domain containing protein%2C expressed.
Os11t0610000-00	chr11	9565	293	0.0306325	Similar to NB-ARC domain containing protein.
Os11t0618300-01	chr11	3259	73	0.0223995	Hypothetical conserved gene.
Os11t0623200-00	chr11	609	46	0.0755337	Conserved hypothetical protein.
Os11t0625400-00	chr11	1207	24	0.019884	Putative B3 domain-containing protein Os11g0625400.
Os11t0626700-02	chr11	1102	57	0.0517241	Hypothetical conserved gene.
Os11t0646300-00	chr11	3933	57	0.0144928	NB-ARC domain containing protein.
Os11t0646450-00	chr11	2493	0	0	Hypothetical protein.
Os11t0687800-01	chr11	6344	355	0.0559584	NB-ARC domain containing protein.
Os11t0687800-02	chr11	6278	355	0.0565467	NB-ARC domain containing protein.
Os11t0688000-00	chr11	438	0	0	Conserved hypothetical protein.
Os12t0103580-00	chr12	906	0	0	Peptidase C48%2C SUMO/Sentrin/Ubl1 domain containing protein.
Os12t0110951-01	chr12	544	47	0.0863971	Hypothetical gene.
Os12t0180600-00	chr12	8170	211	0.0258262	Similar to HAD superfamily hydrolase%2C 5
Os12t0180900-01	chr12	3011	8	0.00265692	Conserved hypothetical protein.
Os12t0197600-01	chr12	2031	0	0	Hypothetical gene.
Os12t0204000-00	chr12	1863	15	0.00805153	Similar to HAT family dimerisation domain containing protein.
Os12t0214700-01	chr12	773	25	0.0323415	Conserved hypothetical protein.
Os12t0218800-01	chr12	592	32	0.0540541	Hypothetical protein.
Os12t0222300-01	chr12	577	45	0.0779896	Conserved hypothetical protein.
Os12t0248600-01	chr12	579	54	0.0932642	Hypothetical protein.
Os12t0422800-01	chr12	1263	0	0	Conserved hypothetical protein.
Os12t0459300-02	chr12	548	0	0	Hypothetical gene.
Os12t0483450-00	chr12	768	25	0.0325521	Protein of unknown function DUF1719%2C Oryza sativa domain containing protein.
Os12t0522516-00	chr12	344	24	0.0697674	Similar to ATRL5 (ARABIDOPSIS RAD-LIKE 5)%3B DNA binding / transcription factor.
Os12t0540000-01	chr12	2509	190	0.0757274	Domain of unknown function DUF1618 domain containing protein.
Os12t0540100-01	chr12	3793	0	0	Conserved hypothetical protein.
Os12t0545400-00	chr12	1929	102	0.0528771	Conserved hypothetical protein.
